# Supplementary material
Source: MDPI journal article supplement (https://www.mdpi.com/2075-4701/11/11/1841)
Supplement: s1 [file s1]

## Supplementary Materials

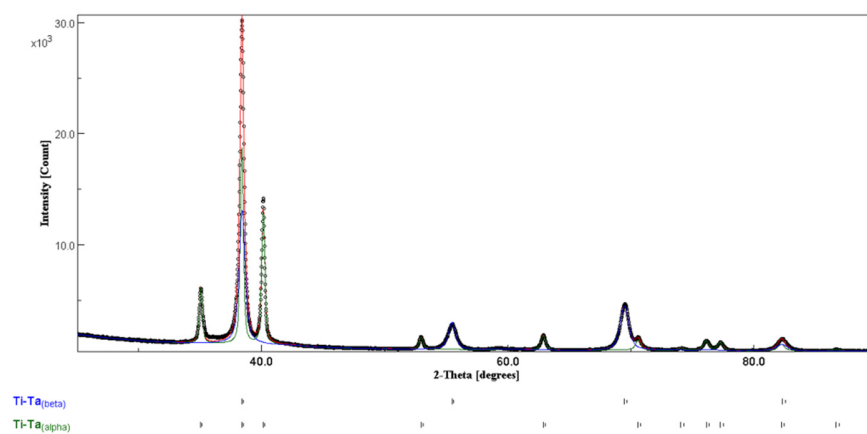

(a)

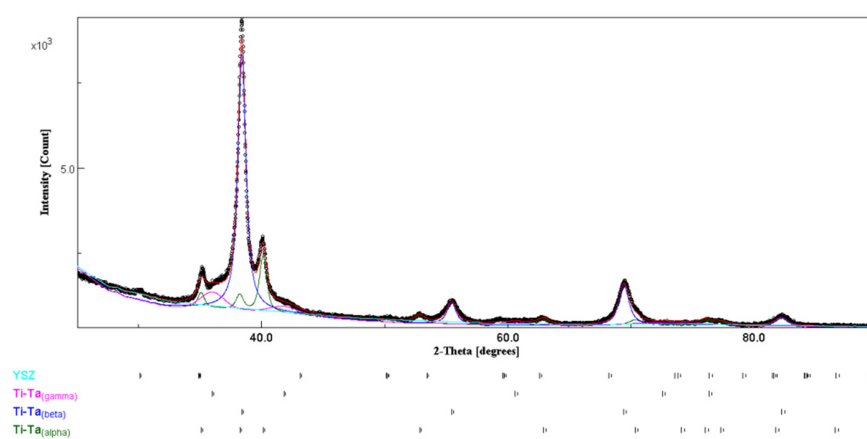

(b)

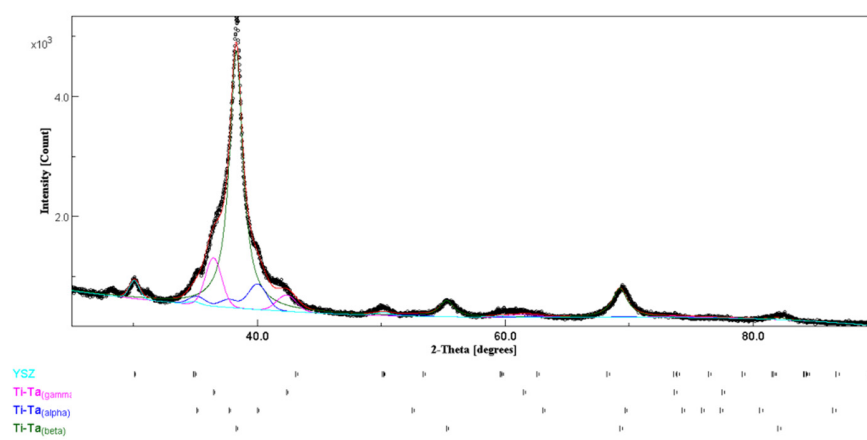

(c)

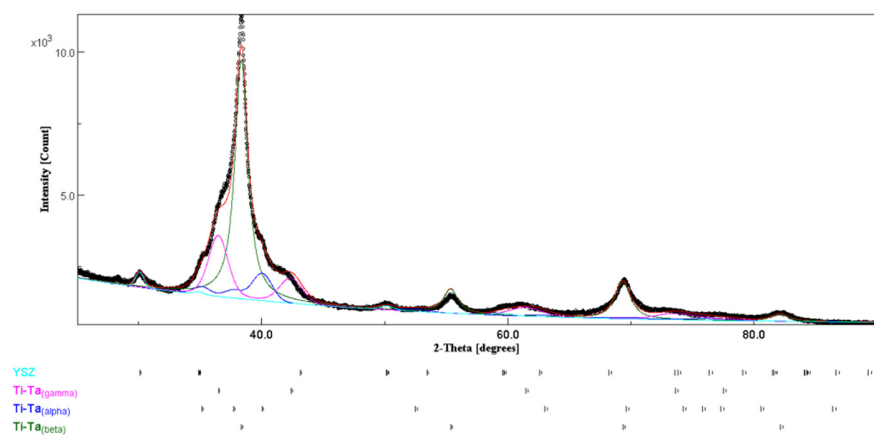

(d)

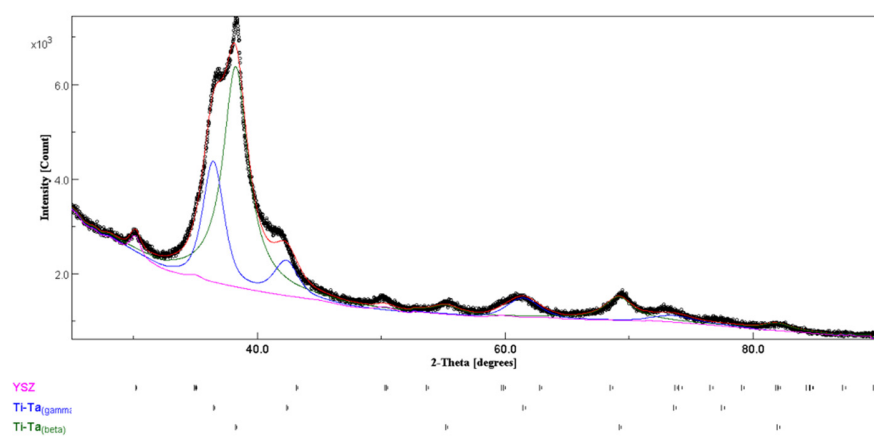

(e)

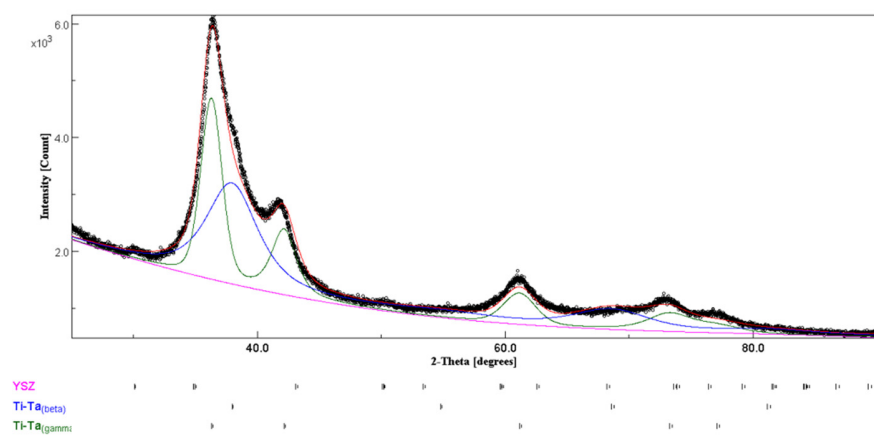

(f)

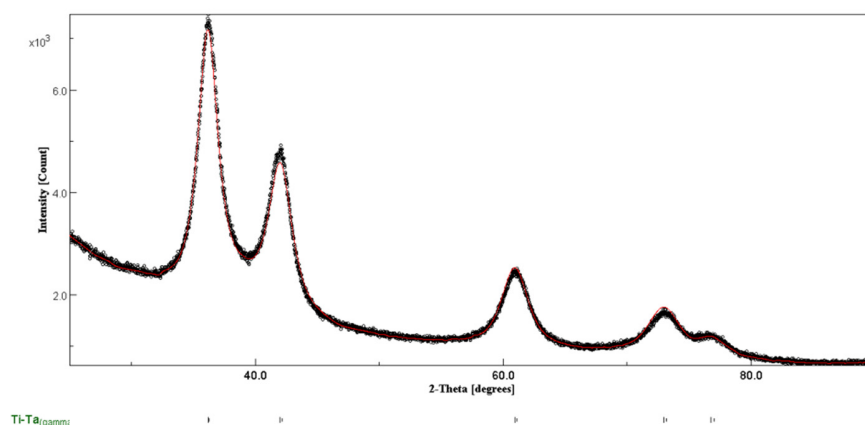

(g)

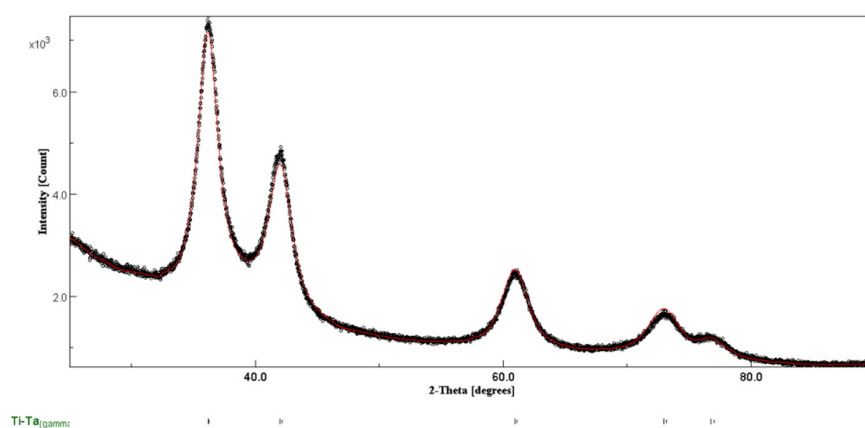

(h)

**Figure S1.** Rietveld refinement of the XRD patterns for the Ti-13Ta at: (a)2, (b)5, (c)10, (d)15, (e)20, (f)30, (g)50 and (h) 100 h of MA, experimental data (point) and modelling result (line).

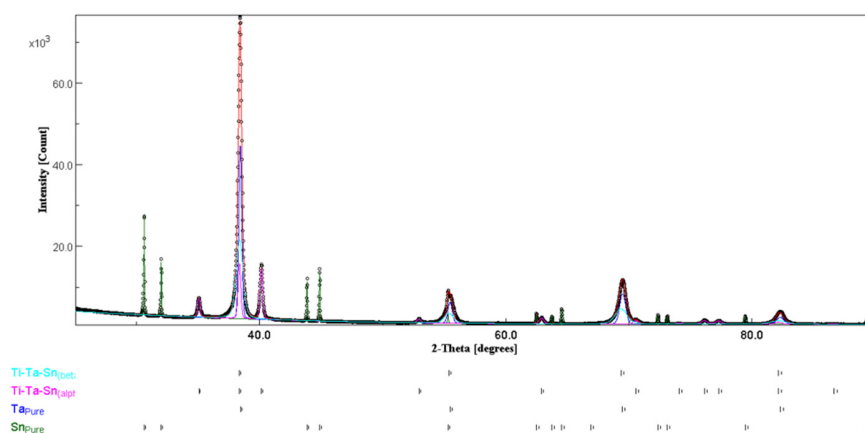

(a)

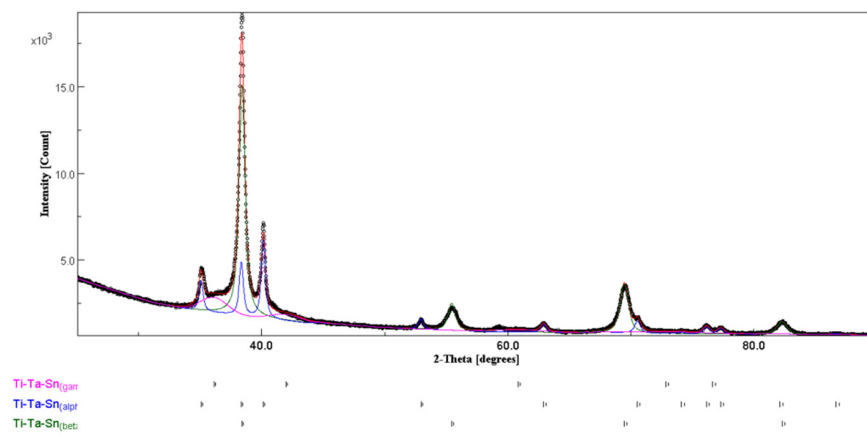

(b)

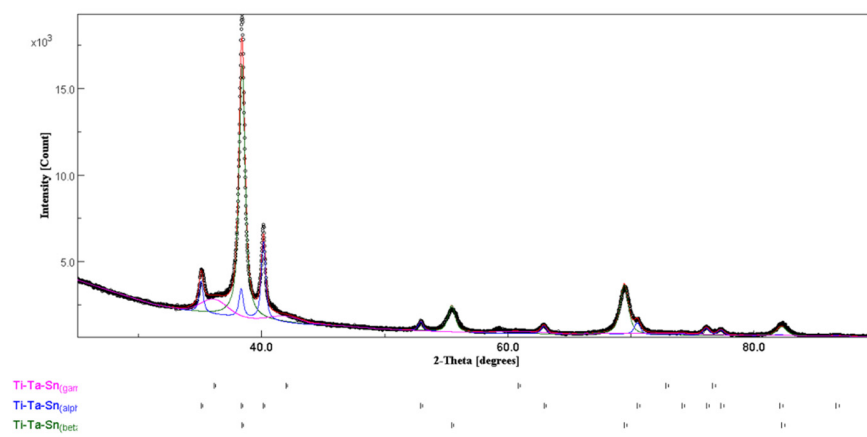

(c)

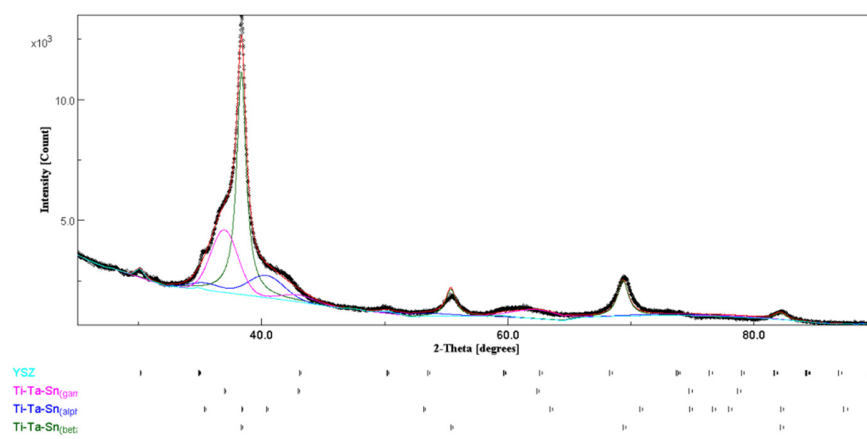

(d)

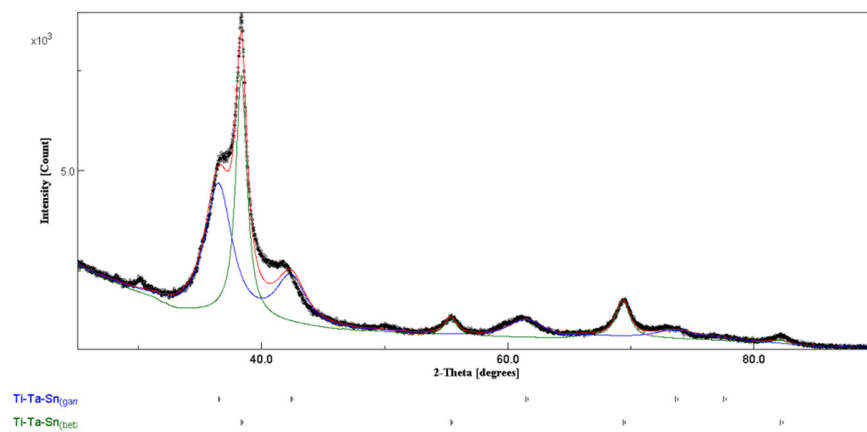

(e)

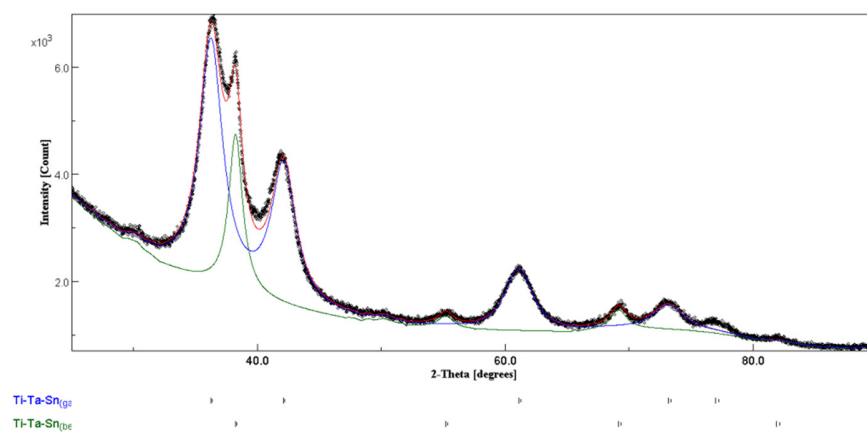

(f)

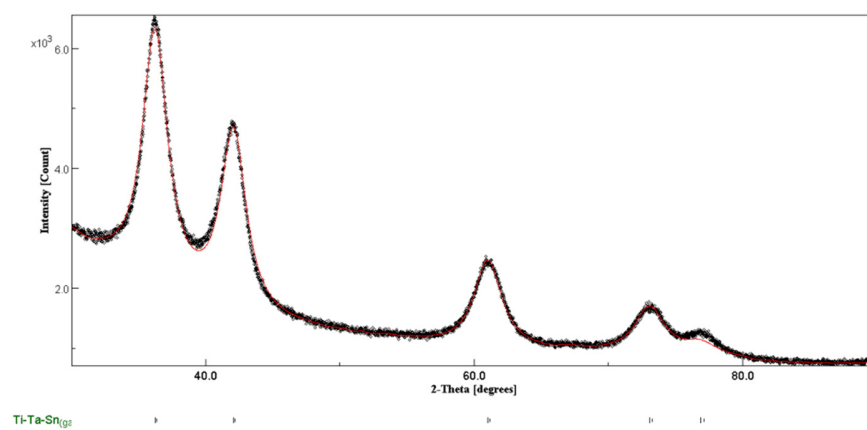

(g)

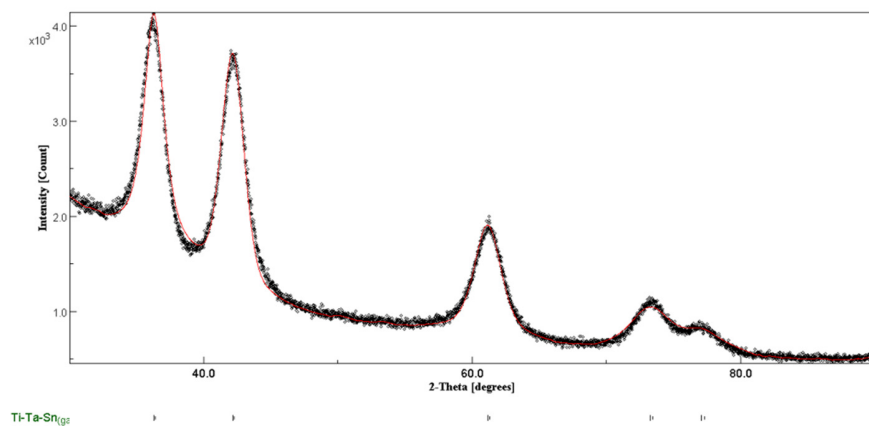

(h)

**Figure S2.** Rietveld refinement of the XRD patterns for the Ti-13Ta-6Sn at: (a)2, (b)5, (c)10, (d)15, (e)20, (f)30, (g)50 and (h) 100 h of MA, experimental data (point) and modelling result (line).

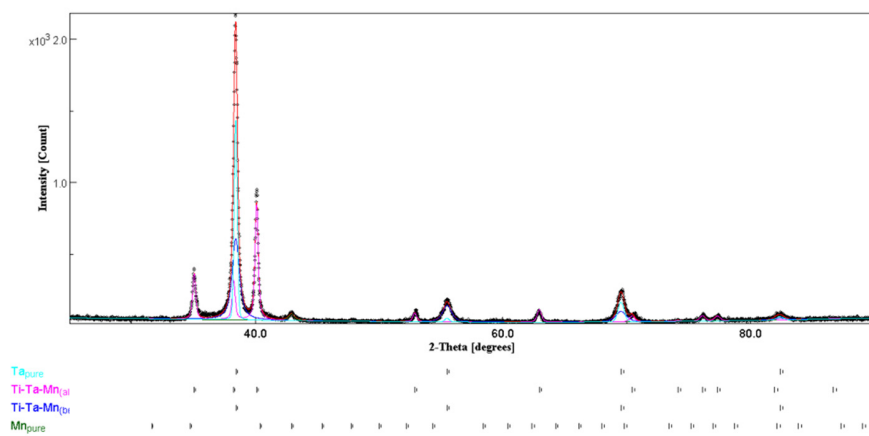

(a)

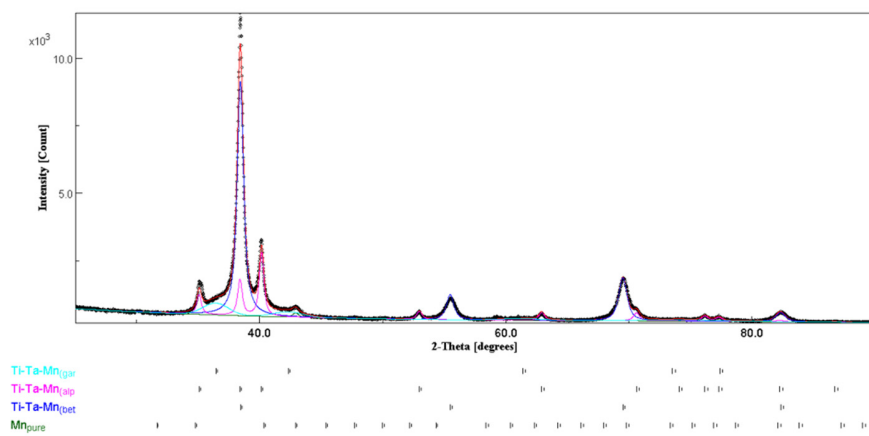

(b)

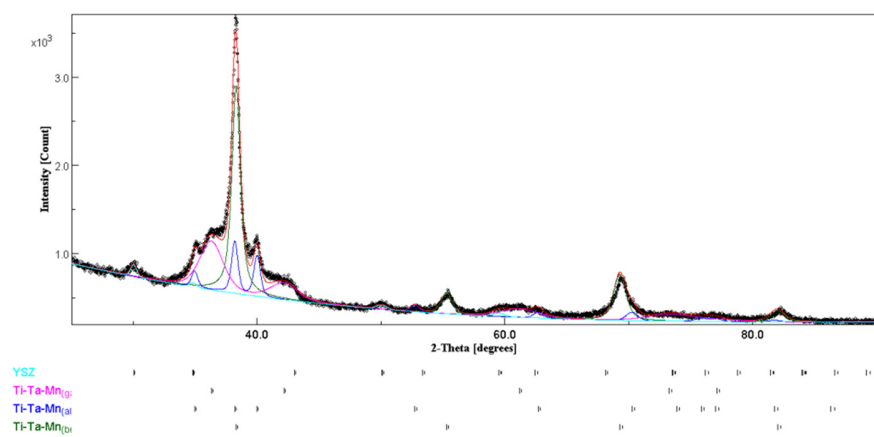

(c)

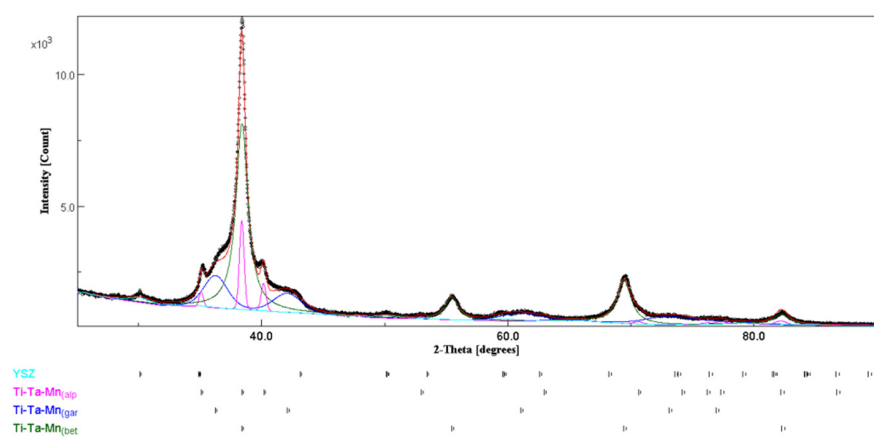

(d)

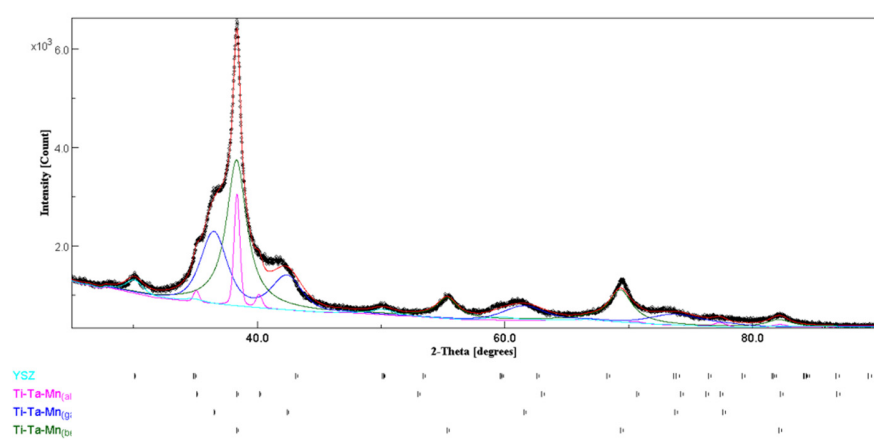

(e)

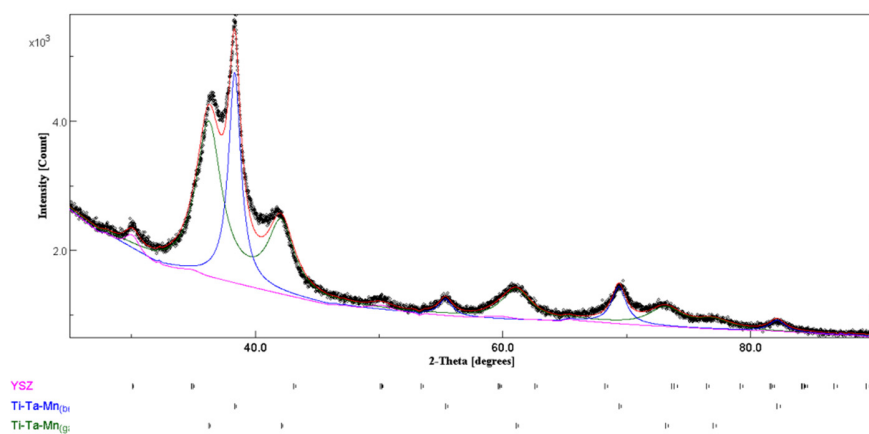

(f)

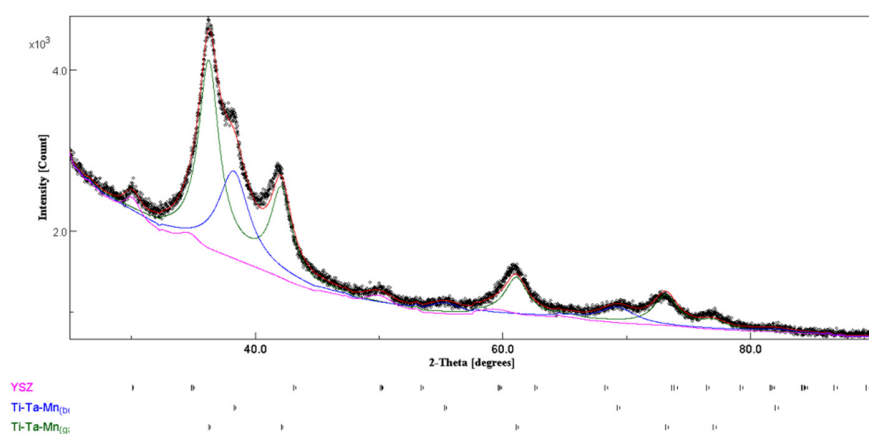

(g)

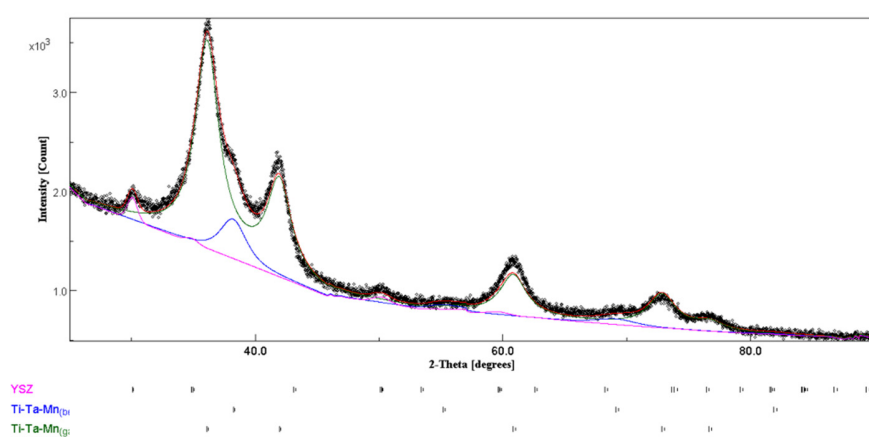

(h)

**Figure S3.** Rietveld refinement of the XRD patterns for the Ti-13Ta-6Mn at: (a)2, (b)5, (c)10, (d)15, (e)20, (f)30, (g)50 and (h) 100 h of MA, experimental data (point) and modelling result (line).



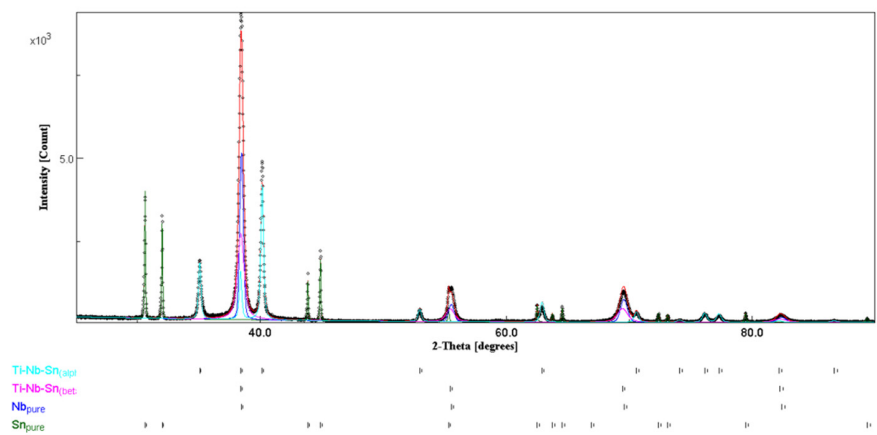

(a)

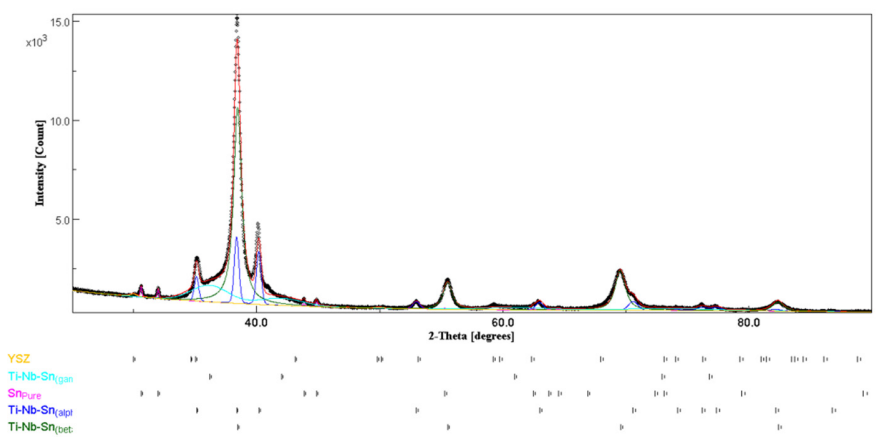

(b)

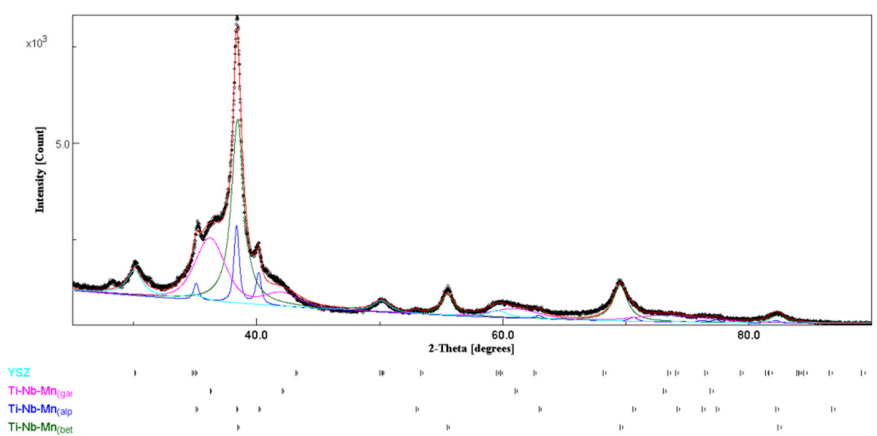

(c)

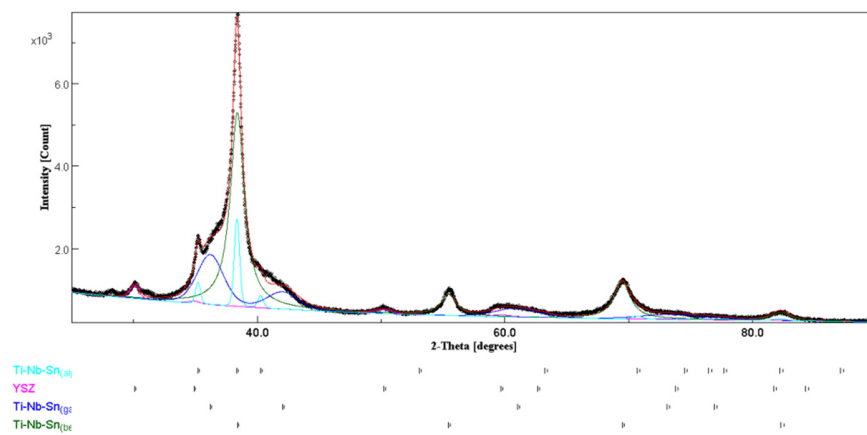

(d)

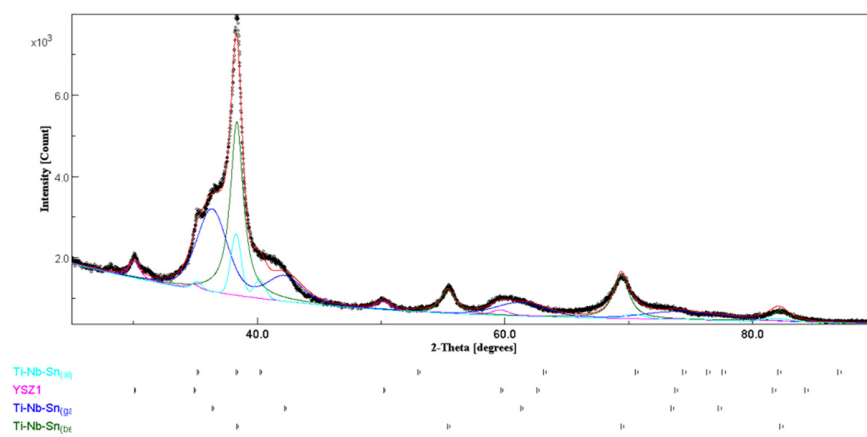

(e)

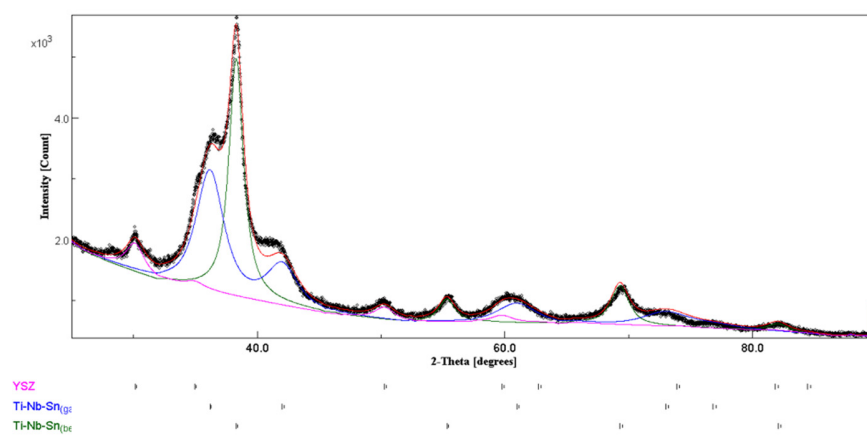

(f)

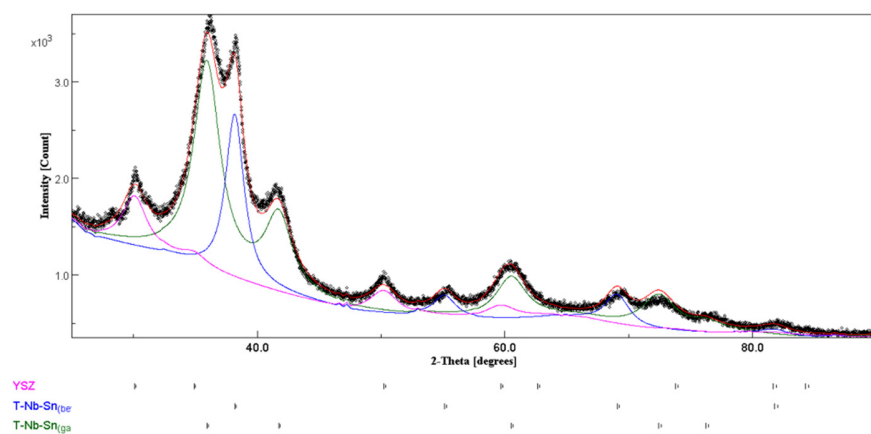

(g)

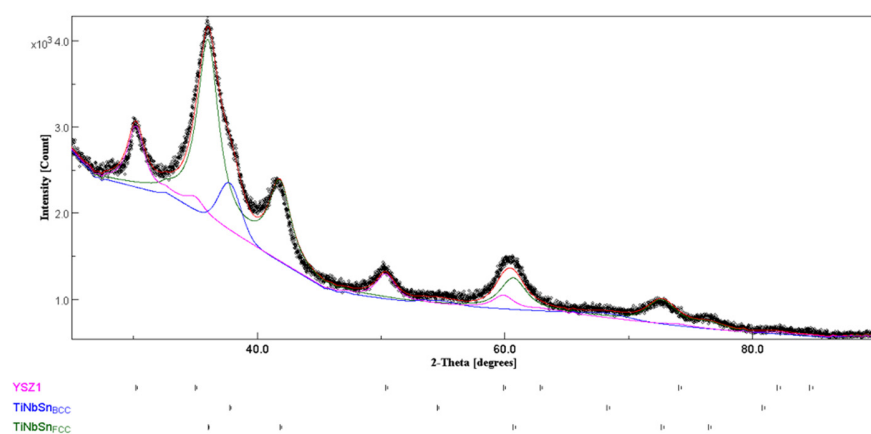

(h)

**Figure S4.** Rietveld refinement of the XRD patterns for the Ti-30Nb-6Sn at: (a)2, (b)5, (c)10, (d)15, (e)20, (f)30, (g)50 and (h) 100 h of MA, experimental data (point) and modelling result (line), the difference between experimental and calculated patterns is given below.

**Table S1.** Results of Rietveld analysis for the Ti-13Ta alloy.

| Milling Time (h) | Phases  | a <sub>0</sub> (nm) | c <sub>0</sub> (nm) | wt (%)   | <D> (nm) | <ε <sup>2</sup> > <sup>1/2</sup> | Gof    | Rwp (%) |
|------------------|---------|---------------------|---------------------|----------|----------|----------------------------------|--------|---------|
| 2                | α-Ti-Ta | 0.2955              | 0.4688              | 61.9224  | 58.3398  | 0.0019                           | 2.6382 | 8.0087  |
|                  | β-Ti-Ta | 0.3311              |                     | 38.0776  | 33.5950  | 0.0031                           |        |         |
| 5                | α-Ti-Ta | 0.2951              | 0.4705              | 33.6852  | 22.3771  | 0.0040                           | 1.7428 | 6.1408  |
|                  | β-Ti-Ta | 0.3312              |                     | 53.2538  | 14.8284  | 0.0025                           |        |         |
|                  | γ-Ti-Ta | 0.4306              |                     | 5.0618   | 119.9700 | 0.0250                           |        |         |
|                  | YSZ     | 0.3637              | 0.5130              | 7.9991   | 2.7834   | 0.0006                           |        |         |
| 10               | α-Ti-Ta | 0.2947              | 0.4766              | 11.6626  | 118.6525 | 0.0174                           | 1.8320 | 6.7723  |
|                  | β-Ti-Ta | 0.3320              |                     | 67.4858  | 11.0686  | 0.0057                           |        |         |
|                  | γ-Ti-Ta | 0.4262              |                     | 13.8364  | 258.4350 | 0.0172                           |        |         |
|                  | YSZ     | 0.3637              | 0.5130              | 7.0153   | 201.2066 | 0.0130                           |        |         |
| 15               | α-Ti-Ta | 0.2947              | 0.4765              | 23.1589  | 100.2191 | 0.0185                           | 2.4664 | 6.9110  |
|                  | β-Ti-Ta | 0.3316              |                     | 46.6656  | 8.8129   | 0.0029                           |        |         |
|                  | γ-Ti-Ta | 0.4262              |                     | 22.1070  | 16.1270  | 0.0170                           |        |         |
|                  | YSZ     | 0.3637              | 0.5130              | 8.0685   | 141.7744 | 0.0105                           |        |         |
| 20               | β-Ti-Ta | 0.3313              |                     | 68.2580  | 10.4063  | 0.0148                           | 2.1909 | 5.6445  |
|                  | γ-Ti-Ta | 0.4274              |                     | 28.7287  | 8.6912   | 0.0174                           |        |         |
|                  | YSZ     | 0.3618              | 0.5137              | 3.0134   | 80.6215  | 0.0118                           |        |         |
| 30               | β-Ti-Ta | 0.3357              |                     | 61.0262  | 156.5503 | 0.0480                           | 1.5667 | 4.4034  |
|                  | γ-Ti-Ta | 0.4282              |                     | 38.6386  | 6.5156   | 0.0102                           |        |         |
|                  | YSZ     | 0.3637              | 0.5130              | 0.3352   | 100.0000 | 0.0006                           |        |         |
| 50               | γ-Ti-Ta | 0.4295              |                     | 100.0000 | 6.1665   | 0.0083                           | 1.2744 | 3.3795  |
| 100              | γ-Ti-Ta | 0.4299              |                     | 100.0000 | 5.6509   | 0.0104                           | 2.5118 | 5.7463  |

**Table S2.** Results of Rietveld analysis for the Ti-13Ta-6Sn alloy

| Milling Time (h) | Phases     | a <sub>0</sub> (nm) | c <sub>0</sub> (nm) | wt (%)  | <D> (nm) | <ε <sup>2</sup> > <sup>1/2</sup> | Gof    | Rwp (%) |
|------------------|------------|---------------------|---------------------|---------|----------|----------------------------------|--------|---------|
| 2                | Ta         | 0.3311              |                     | 30.5000 | 406.4769 | 0.0032                           | 1.8559 | 5.4935  |
|                  | Sn         | 0.5834              | 0.3182              | 3.5386  | 304.2689 | 0.0004                           |        |         |
|                  | α-Ti-Ta-Sn | 0.2952              |                     | 36.0041 | 69.5914  | 0.0019                           |        |         |
|                  | β-Ti-Ta-Sn | 0.3317              |                     | 29.9559 | 29.3188  | 0.0031                           |        |         |
| 5                | α-Ti-Ta-Sn | 0.2952              | 0.4686              | 29.9700 | 34.5981  | 0.0040                           | 1.8230 | 5.0103  |
|                  | β-Ti-Ta-Sn | 0.3311              |                     | 61.2236 | 19.4780  | 0.0025                           |        |         |
|                  | γ-Ti-Ta-Sn | 0.4299              |                     | 8.8064  | 326.5796 | 0.0250                           |        |         |
| 10               | α-Ti-Ta-Sn | 0.2951              | 0.4693              | 16.3602 | 146.1771 | 0.0174                           | 1.8468 | 5.0064  |
|                  | β-Ti-Ta-Sn | 0.3308              |                     | 72.4336 | 10.5221  | 0.0057                           |        |         |

|     |                    |        |        |          |          |        |        |        |
|-----|--------------------|--------|--------|----------|----------|--------|--------|--------|
|     | $\gamma$ -Ti-Ta-Sn | 0.4279 |        | 9.1494   | 133.7276 | 0.0172 |        |        |
|     | YSZ                | 0.3633 | 0.5143 | 2.0568   | 82.0511  | 0.0130 |        |        |
| 15  | $\alpha$ -Ti-Ta-Sn | 0.2918 | 0.4687 | 6.8179   | 83.5645  | 0.0185 | 1.8466 | 4.7873 |
|     | $\beta$ -Ti-Ta-Sn  | 0.3316 |        | 57.3680  | 8.1467   | 0.0029 |        |        |
|     | $\gamma$ -Ti-Ta-Sn | 0.4246 |        | 14.8322  | 65.9067  | 0.0170 |        |        |
|     | YSZ                | 0.3630 | 0.5139 | 20.9819  | 5.3713   | 0.0130 |        |        |
| 20  | $\beta$ -Ti-Ta-Sn  | 0.3322 |        | 67.2696  | 5.9804   | 0.0148 | 1.9528 | 5.3808 |
|     | $\gamma$ -Ti-Ta-Sn | 0.4287 |        | 32.7304  | 5.3070   | 0.0174 |        |        |
| 30  | $\beta$ -Ti-Ta-Sn  | 0.3330 |        | 38.2654  | 6.0391   | 0.0480 | 1.4301 | 3.4815 |
|     | $\gamma$ -Ti-Ta-Sn | 0.4288 |        | 61.7346  | 5.6731   | 0.0102 |        |        |
| 50  | $\gamma$ -Ti-Ta-Sn | 0.4290 |        | 100.0000 | 4.6748   | 0.0083 | 1.3974 | 3.6185 |
| 100 | $\gamma$ -Ti-Ta-Sn | 0.4289 |        | 100.0000 | 8.3460   | 0.0104 | 1.4988 | 4.7249 |

**Table S3.** Results of Rietveld analysis for the Ti-13Ta-6Mn alloy

| Milling Time (h) | Phases             | $a_0$ (nm) | $c_0$ (nm) | wt (%)  | $\langle D \rangle$ (nm) | $\langle \epsilon^2 \rangle^{1/2}$ | Gof    | Rwp (%) |
|------------------|--------------------|------------|------------|---------|--------------------------|------------------------------------|--------|---------|
| 2                | Ta                 | 0.3309     |            | 12.5146 | 195.3992                 | 0.0028                             | 1.0118 | 9.6275  |
|                  | Mn                 | 0.6314     |            | 3.7371  | 19.6652                  | 0.0007                             |        |         |
|                  | $\alpha$ -Ti-Ta-Mn | 0.2951     | 0.4700     | 52.6953 | 47.8495                  | 0.0012                             |        |         |
|                  | $\beta$ -Ti-Ta-Mn  | 0.3309     |            | 31.0530 | 18.1999                  | 0.0032                             |        |         |
| 5                | Mn                 | 0.6315     |            | 0.7357  | 199.0078                 | 0.0052                             | 1.7414 | 7.6521  |
|                  | $\alpha$ -Ti-Ta-Mn | 0.2951     | 0.4684     | 33.1752 | 27.3253                  | 0.0016                             |        |         |
|                  | $\beta$ -Ti-Ta-Mn  | 0.3309     |            | 56.3619 | 19.4217                  | 0.0024                             |        |         |
|                  | $\gamma$ -Ti-Ta-Mn | 0.4267     |            | 9.7272  | 280.7575                 | 0.0276                             |        |         |
| 10               | $\alpha$ -Ti-Ta-Mn | 0.2961     | 0.4709     | 27.7414 | 32.2734                  | 0.0045                             | 1.2527 | 5.9094  |
|                  | $\beta$ -Ti-Ta-Mn  | 0.3319     |            | 39.8829 | 12.1312                  | 0.0001                             |        |         |
|                  | $\gamma$ -Ti-Ta-Mn | 0.4282     |            | 28.4286 | 10.1965                  | 0.0186                             |        |         |
|                  | YSZ                | 0.3639     | 0.5151     | 3.9471  | 100.9036                 | 0.0073                             |        |         |
| 15               | $\alpha$ -Ti-Ta-Mn | 0.2951     | 0.4686     | 12.0449 | 282.2148                 | 0.0045                             | 2.3352 | 7.0731  |
|                  | $\beta$ -Ti-Ta-Mn  | 0.3312     |            | 56.0312 | 9.1144                   | 0.0012                             |        |         |
|                  | $\gamma$ -Ti-Ta-Mn | 0.4289     |            | 25.5023 | 15.1674                  | 0.0215                             |        |         |
|                  | YSZ                | 0.3639     | 0.5130     | 6.4216  | 5.5675                   | 0.0079                             |        |         |
| 20               | $\alpha$ -Ti-Ta-Mn | 0.2950     | 0.4687     | 8.4768  | 9.6828                   | 0.0054                             | 1.8100 | 6.3374  |
|                  | $\beta$ -Ti-Ta-Mn  | 0.3318     |            | 47.6704 | 8.3450                   | 0.0025                             |        |         |
|                  | $\gamma$ -Ti-Ta-Mn | 0.4281     |            | 38.1104 | 6.0282                   | 0.0115                             |        |         |
|                  | YSZ                | 0.3639     | 0.5130     | 5.7424  | 8.3060                   | 0.0104                             |        |         |
| 30               | $\beta$ -Ti-Ta-Mn  | 0.3320     |            | 44.2039 | 5.5591                   | 0.0016                             | 1.5287 | 4.2387  |
|                  | $\gamma$ -Ti-Ta-Mn | 0.4288     |            | 51.7137 | 5.2463                   | 0.0088                             |        |         |
|                  | YSZ                | 0.3639     | 0.5130     | 4.0824  | 21.4470                  | 0.0133                             |        |         |
| 50               | $\beta$ -Ti-Ta-Mn  | 0.3322     |            | 28.2918 | 3.5433                   | 0.0050                             | 1.2844 | 3.5526  |
|                  | $\gamma$ -Ti-Ta-Mn | 0.4288     |            | 68.1822 | 4.7886                   | 0.0009                             |        |         |

|     |                    |        |        |         |          |        |        |        |
|-----|--------------------|--------|--------|---------|----------|--------|--------|--------|
|     | YSZ                | 0.3639 | 0.5130 | 3.5260  | 93.7982  | 0.0186 |        |        |
|     | $\beta$ -Ti-Ta-Mn  | 0.3326 |        | 13.4192 | 5.4027   | 0.0121 |        |        |
| 100 | $\gamma$ -Ti-Ta-Mn | 0.4304 |        | 82.8792 | 4.7974   | 0.0025 | 1.8171 | 5.6556 |
|     | YSZ                | 0.3639 | 0.5130 | 3.7016  | 100.3447 | 0.0122 |        |        |

**Table S4.** Results of Rietveld analysis for the Ti-30Nb-6Sn alloy

| Milling Time (h) | Phases             | a <sub>0</sub> (nm) | c <sub>0</sub> (nm) | wt (%)  | <D> (nm) | < $\epsilon^2$ > <sup>1/2</sup> | Gof    | Rwp (%) |
|------------------|--------------------|---------------------|---------------------|---------|----------|---------------------------------|--------|---------|
| 2                | Nb                 | 0.3306              |                     | 21.5655 | 111.1632 | 0.0031                          | 1.7466 | 9.6688  |
|                  | Sn                 | 0.5834              | 0.3182              | 6.9359  | 222.7709 | 0.0004                          |        |         |
|                  | $\alpha$ -Ti-Nb-Sn | 0.2952              | 0.4687              | 43.5371 | 61.4815  | 0.0014                          |        |         |
|                  | $\beta$ -Ti-Nb-Sn  | 0.3313              |                     | 27.9616 | 22.0082  | 0.0032                          |        |         |
| 5                | Sn                 | 0.5835              | 0.3184              | 0.9890  | 217.5771 | 0.0019                          | 2.4367 | 8.6514  |
|                  | $\alpha$ -Ti-Nb-Sn | 0.2949              | 0.4687              | 21.2356 | 125.9885 | 0.0042                          |        |         |
|                  | $\beta$ -Ti-Nb-Sn  | 0.3308              |                     | 59.5146 | 14.4054  | 0.0018                          |        |         |
|                  | $\gamma$ -Ti-Nb-Sn | 0.4281              |                     | 17.2425 | 325.5034 | 0.0323                          |        |         |
|                  | YSZ                | 0.3658              | 0.5117              | 1.0184  | 17.3204  | 0.0018                          |        |         |
| 10               | $\alpha$ -Ti-Nb-Sn | 0.2950              | 0.4687              | 8.8433  | 17.8810  | 0.0006                          | 2.2009 | 7.7422  |
|                  | $\beta$ -Ti-Nb-Sn  | 0.3308              |                     | 43.6639 | 10.6576  | 0.0000                          |        |         |
|                  | $\gamma$ -Ti-Nb-Sn | 0.4293              |                     | 33.9771 | 7.4004   | 0.0235                          |        |         |
|                  | YSZ                | 0.3644              | 0.5117              | 13.5158 | 7.0611   | 0.0023                          |        |         |
| 15               | $\alpha$ -Ti-Nb-Sn | 0.2939              | 0.4688              | 7.5281  | 149.0952 | 0.0048                          | 1.5709 | 6.3150  |
|                  | $\beta$ -Ti-Nb-Sn  | 0.3312              |                     | 59.5812 | 8.2175   | 0.0004                          |        |         |
|                  | $\gamma$ -Ti-Nb-Sn | 0.4292              |                     | 27.4034 | 10.9229  | 0.0229                          |        |         |
|                  | YSZ                | 0.5135              |                     | 3.1935  | 97.9051  | 0.0113                          |        |         |
| 20               | $\alpha$ -Ti-Nb-Sn | 0.2944              | 0.4696              | 2.3420  | 203.4136 | 0.0071                          | 2.0664 | 6.5469  |
|                  | $\beta$ -Ti-Nb-Sn  | 0.3316              |                     | 49.6064 | 8.7652   | 0.0023                          |        |         |
|                  | $\gamma$ -Ti-Nb-Sn | 0.4285              |                     | 40.6812 | 8.8012   | 0.0249                          |        |         |
|                  | YSZ                | 0.3644              | 0.5138              | 7.3705  | 9.9253   | 0.0056                          |        |         |
| 30               | $\beta$ -Ti-Nb-Sn  | 0.3320              |                     | 41.0940 | 7.0092   | 0.0026                          | 1.5134 | 4.8373  |
|                  | $\gamma$ -Ti-Nb-Sn | 0.4296              |                     | 47.2171 | 4.9228   | 0.0124                          |        |         |
|                  | YSZ                | 0.3644              | 0.5127              | 11.6889 | 5.7251   | 0.0028                          |        |         |
| 50               | $\beta$ -Ti-Nb-Sn  | 0.3329              |                     | 24.9448 | 6.3600   | 0.0049                          | 1.4656 | 4.9700  |
|                  | $\gamma$ -Ti-Nb-Sn | 0.4324              |                     | 57.4478 | 4.1944   | 0.0041                          |        |         |
|                  | YSZ                | 0.3644              | 0.5135              | 0.1867  | 4.6144   | 0.0063                          |        |         |
| 100              | $\beta$ -Ti-Nb-Sn  | 0.3363              |                     | 10.4133 | 67.7282  | 0.0217                          | 1.4646 | 4.2582  |
|                  | $\gamma$ -Ti-Nb-Sn | 0.4314              |                     | 66.2735 | 5.5910   | 0.0063                          |        |         |
|                  | YSZ                | 0.3644              | 0.5119              | 23.3132 | 6.6042   | 0.0044                          |        |         |
